# Supplementary material for: Metformin Prevents Cisplatin-Induced Cognitive Impairment and Brain Damage in Mice
Source: PubMed Central journal article supplement (PMC4809545; doi:10.1371/journal.pone.0151890), 2016-03-28

### Latency to First Interaction with Novel Object

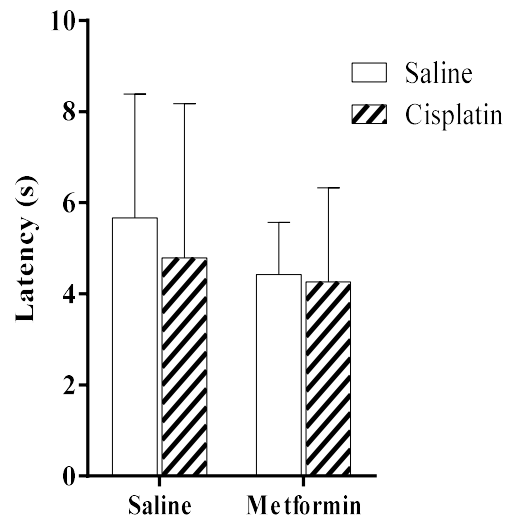

Supplement: pone.0151890.s001.pdf [file pone.0151890.s001.pdf]
